# Supplementary material for: Two-Stage Surgical Management for Acutely Presented Large Vestibular Schwannomas: Report of Two Cases
Source: MDPI journal article supplement (doi:10.3390/brainsci13111548), 2023-11-04
Supplement: s1 [file s1]

Supplementary material is a video

<https://doi.org/10.5281/zenodo.8378328>
